# Supplementary material
Source: PubMed Central journal article supplement (PMC6996584)

WB figure 2C Top panel

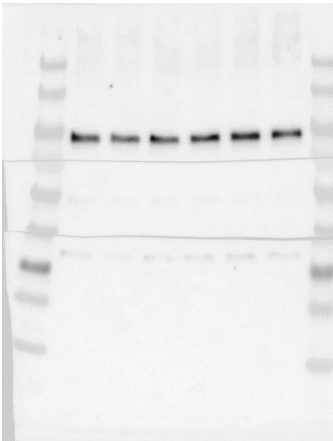

Exposure for ECHA

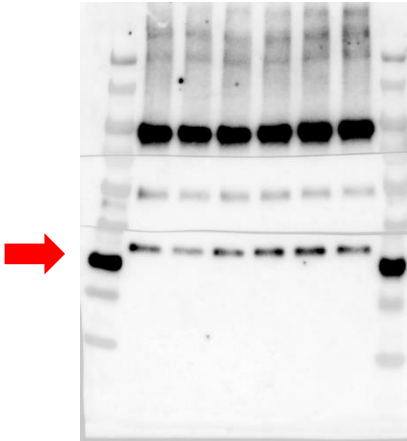

Exposure for HCDH

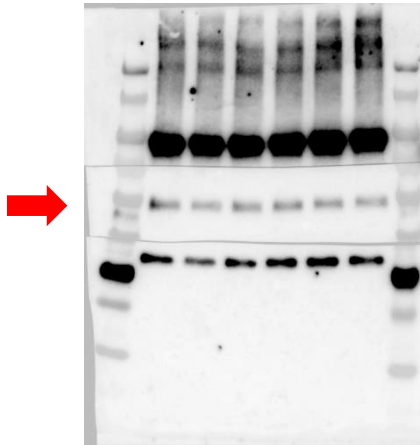

Exposure for FLOT1

WB figure 2C Bottom panel

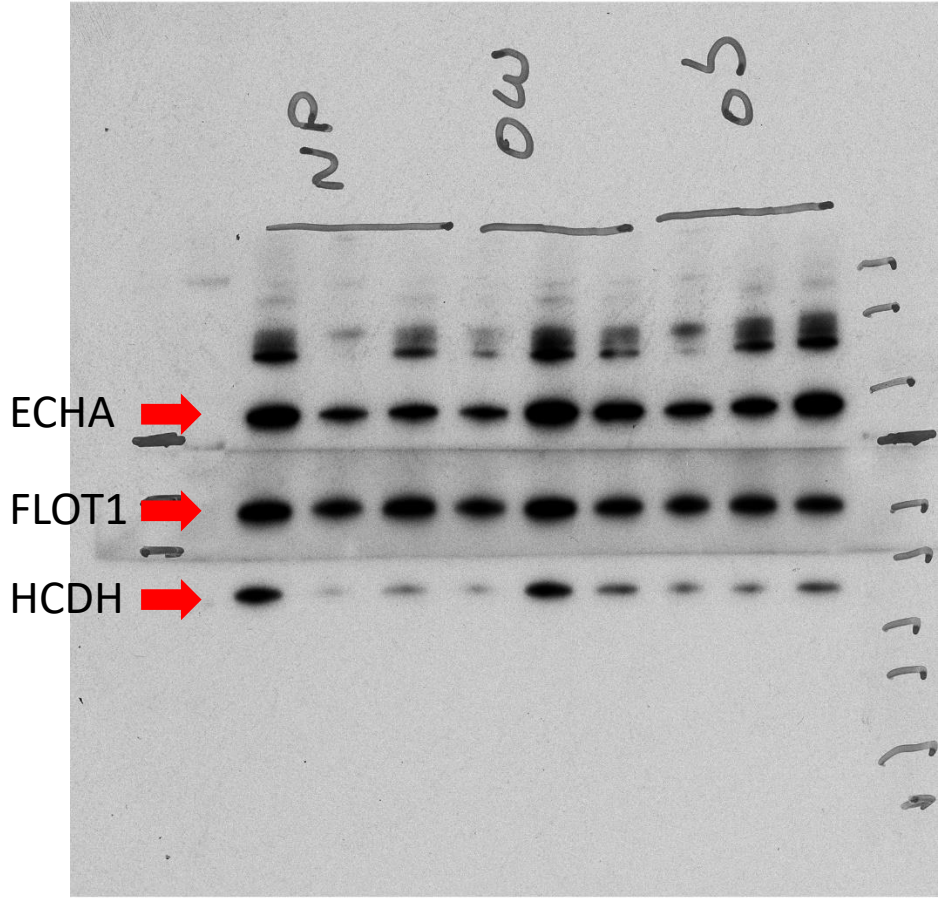

WB figure 2D

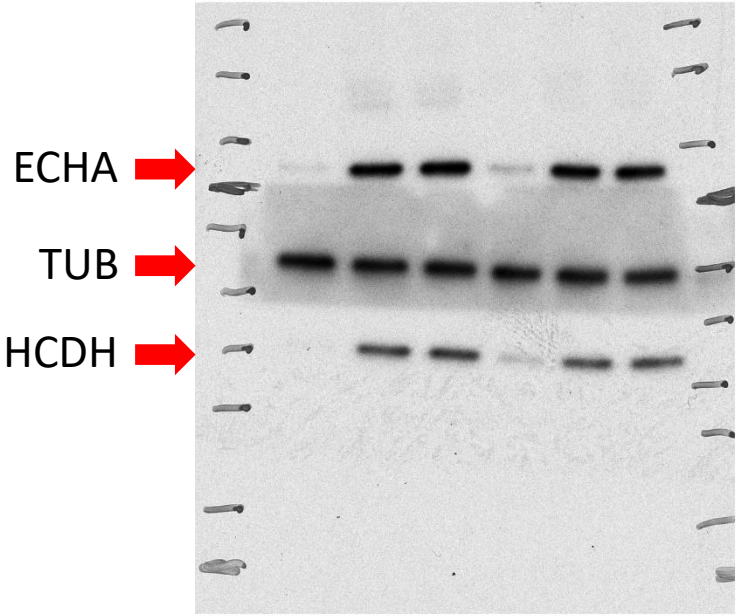

Supplement: EMBJ-39-e102525-s005.pdf [file EMBJ-39-e102525-s005.pdf]
