# Supplementary material
Source: PubMed Central journal article supplement (PMC6996584)
Supplement: EMBJ-39-e102525-s007.pdf [file EMBJ-39-e102525-s007.pdf]

# WB Appendix S4E

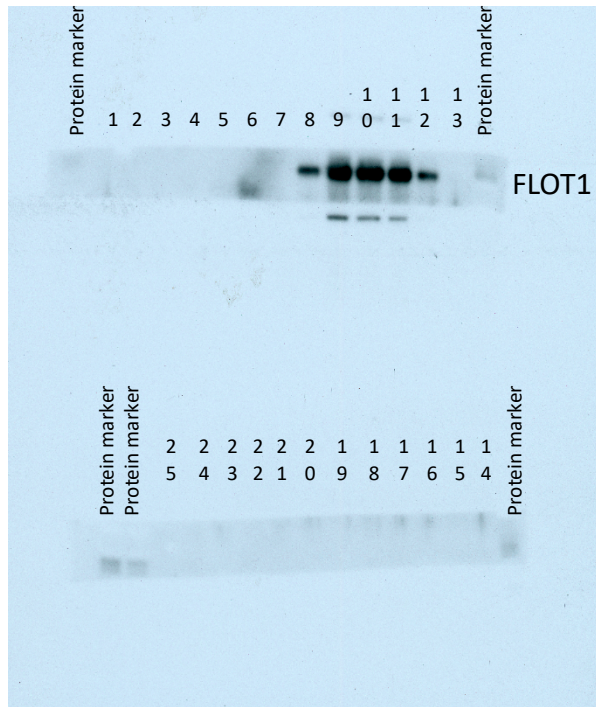

Exposure for FLOT1

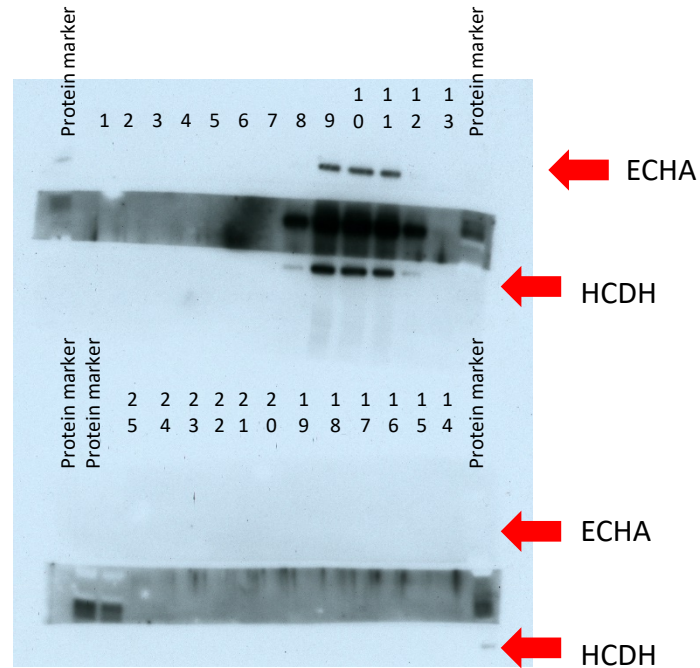

Exposure for ECHA and HCDH

# Western blot Appendix S8D

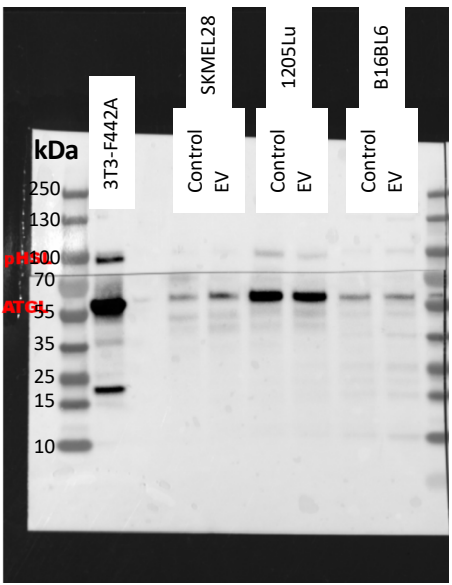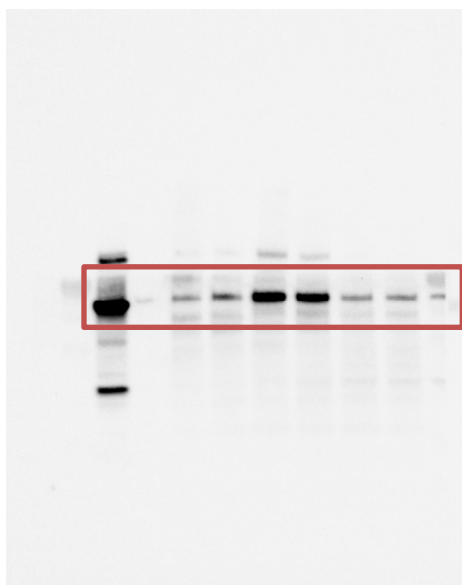

Exposition for ATGL

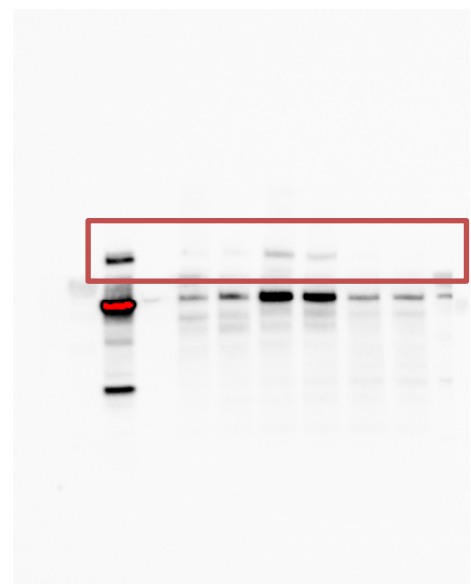

Exposition for pHSL

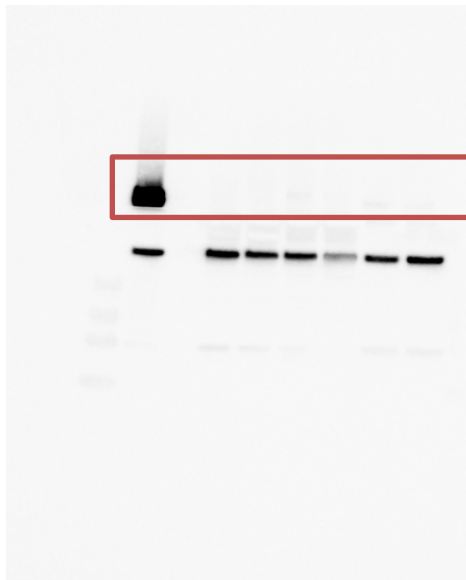

Exposition for HSL

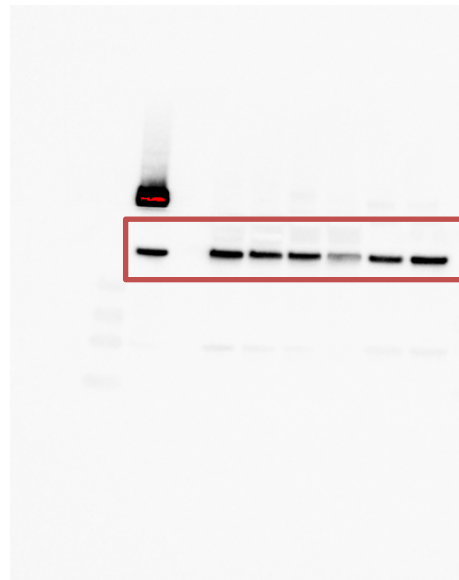

Exposition for Tubulin

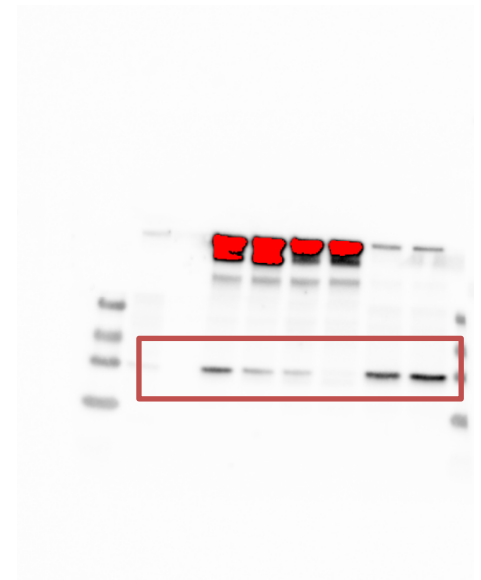

Exposition for MAGL
