# Supplementary material
Source: PubMed Central journal article supplement (PMC6996584)

WB figure 5B

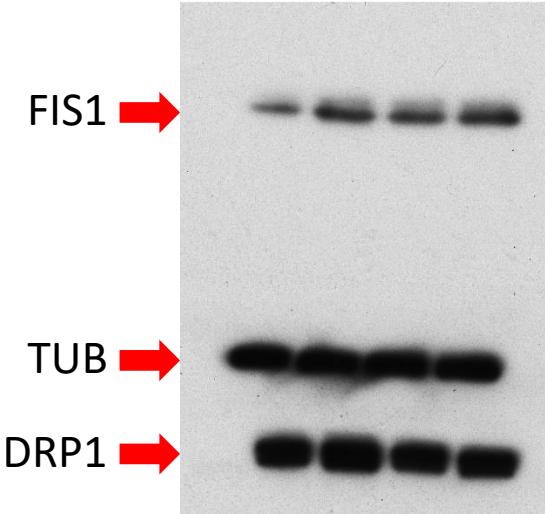

WB figure 5D

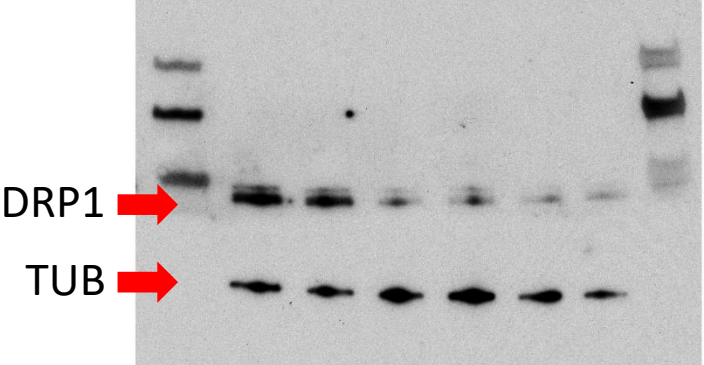

Supplement: EMBJ-39-e102525-s006.pdf [file EMBJ-39-e102525-s006.pdf]
